# Supplementary material for: The transcriptional landscape of lncRNAs reveals the oncogenic function of LINC00511 in ER-negative breast cancer
Source: PubMed Central journal article supplement (PMC6687715; doi:10.1038/s41419-019-1835-3), 2019-08-08

**a**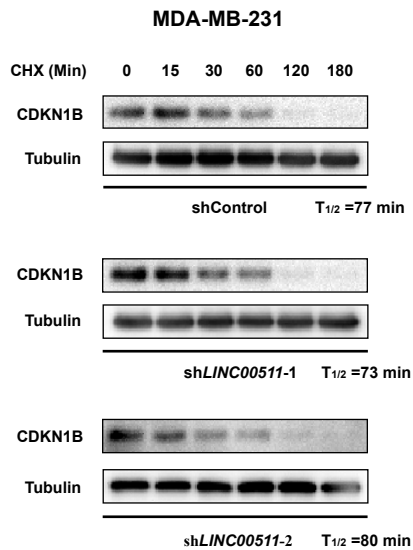**b**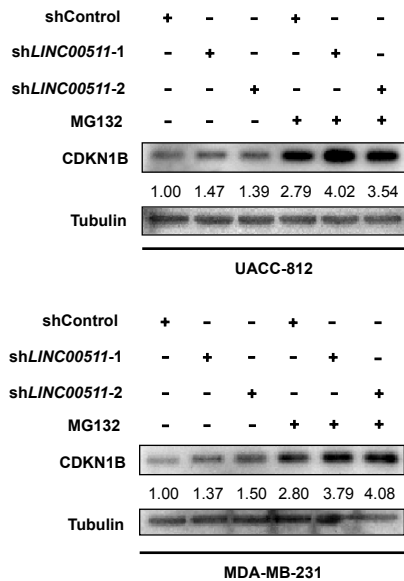**c**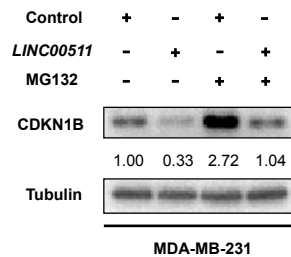

Supplement: 41419_2019_1835_MOESM5_ESM.pdf [file 41419_2019_1835_MOESM5_ESM.pdf]
